# Supplementary material for: Periostin Links Skin Inflammation to Melanoma Progression in Humans and Mice
Source: PubMed Central journal article supplement (PMC6337622; doi:10.3390/ijms20010169), 2019-01-04
Supplement: ijms-20-00169-s001.pdf [file ijms-20-00169-s001.pdf]

## Supplementary Materials

**Supplementary Table S1.** Patient demographic and clinical data.

| <b>Parameters</b>         |                         |
|---------------------------|-------------------------|
| Age, y                    |                         |
| Range (mean $\pm$ SD)     | 32-88 (65.6 $\pm$ 14.2) |
| Gender, No (%)            |                         |
| Male                      | 40 (42.6)               |
| Female                    | 54 (57.4)               |
| Breslow thickness, No (%) |                         |
| Tis                       | 24 (25.8)               |
| T1                        | 17 (18.3)               |
| T2                        | 7 (7.5)                 |
| T3                        | 21 (22.6)               |
| T4                        | 24 (25.8)               |
| TNM stage, No (%)         |                         |
| 0                         | 24 (25.8)               |
| I                         | 21 (22.3)               |
| II                        | 26 (27.7)               |
| III                       | 18 (19.1)               |
| IV                        | 5 (5.3)                 |
| MSS, mo                   |                         |
| Range (mean $\pm$ SD)     | 0-152 (48.2 $\pm$ 44.6) |
| DFS, mo                   |                         |
| Range (mean $\pm$ SD)     | 0-152 (45.8 $\pm$ 43.7) |
| Total patients            | 94                      |

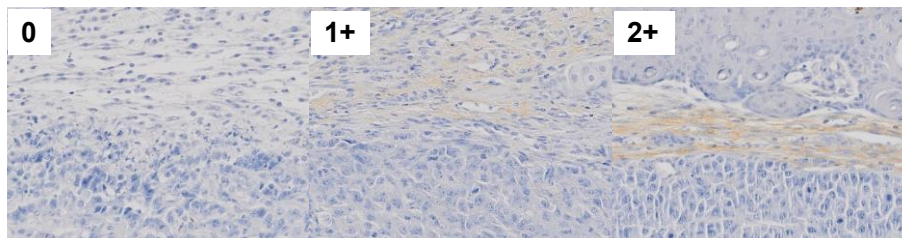

**Supplementary Figure S1.** Immunohistochemical scoring pattern of periostin staining in murine melanoma.
